1 **PEERS - an open science “Platform for the Exchange of Experimental**  
2 **Research Standards” in biomedicine**

3

4 **Annesha Sil<sup>1</sup>, Anton Bespalov<sup>2</sup>, Christina Dalla<sup>3</sup>, Chantelle Ferland-Beckham<sup>4</sup>, Arnoud Herremans<sup>5</sup>,**  
5 **Konstantinos Karantzas<sup>6</sup>, Martien J. Kas<sup>7</sup>, Nikolaos Kokras<sup>3</sup>, Michael J. Parnham<sup>8</sup>, Pavlina Pavlidi<sup>3</sup>,**  
6 **Kostis Pristouris<sup>6</sup>, Thomas Steckler<sup>9</sup>, Gernot Riedel<sup>1†</sup>, Christoph H. Emmerich<sup>2\*†</sup>**

7

8 <sup>1</sup>Institute of Medical Sciences, University of Aberdeen, Scotland, UK

9 <sup>2</sup>PAASP GmbH, Heidelberg, Germany

10 <sup>3</sup>Department of Pharmacology, Medical School, National and Kapodistrian University of Athens, Athens,  
11 Greece

12 <sup>4</sup>Cohen Veterans Bioscience, New York, NY, USA

13 <sup>5</sup>Y47 consultancy, IJsselstein, The Netherlands

14 <sup>6</sup>National and Technical University of Athens, Athens, Greece

15 <sup>7</sup>Groningen Institute for Evolutionary Life Sciences, University of Groningen, Groningen, The Netherlands

16 <sup>8</sup>EpiEndo Pharmaceuticals, Seltjanarnes, Iceland, and Pharmacology Consultant, Bad Soden am Taunus,  
17 Germany.

18 <sup>9</sup>Janssen Pharmaceutica NV, Turnhoutseweg 30, 2340 Beerse, Belgium

19 <sup>†</sup>These authors have contributed equally to this work and share senior authorship

20 \*Correspondence: Christoph H. Emmerich ([christoph.emmerich@paasp.net](mailto:christoph.emmerich@paasp.net))

21 **Keywords: reproducibility, study design, neuroscience, transparency, platform, quality rating, study**  
22 **outcome (Min. 5-Max. 8)**

23

## PEERS - Platform for the Exchange of Experimental Research Standards

### 24 **Abstract**

25 Laboratory workflows and preclinical models have become increasingly diverse and complex. Confronted  
26 with the dilemma of assessing a multitude of information with ambiguous relevance for their specific  
27 experiments, scientists run the risk of overlooking critical factors that can influence the planning, conduct  
28 and results of studies and that should have been considered *a priori*. Negligence of such crucial information  
29 may result in sub-optimal study design and study execution, bringing into question the validity of generated  
30 outcomes. As a corollary, a lot of resources are wasted on biomedical research that turns out to be  
31 irreproducible and not sufficiently robust for further project development.

32 To address this problem, we present 'PEERS' (Platform for the Exchange of Experimental Research  
33 Standards), an open-access online platform that is built to aid scientists in determining which experimental  
34 factors and variables are most likely to affect the outcome of a specific test, model or assay and therefore  
35 ought to be considered during the design, execution and reporting stages.

36 The PEERS database is categorized into *in vivo* and *in vitro* experiments and provides lists of factors derived  
37 from scientific literature that have been deemed critical for experimentation. Most importantly, the platform  
38 is based on a structured and transparent system for rating the strength of evidence related to each identified  
39 factor and its relevance for a specific method/model. In this context, the rating procedure will not solely be  
40 limited to the PEERS working group but will also allow for a community-based grading of evidence.

41 To generate a proof-of-concept that the PEERS approach is feasible, we focused on a set of *in vitro* and *in*  
42 *vivo* methods from the neuroscience field, which are presented in this article. On the basis of the Open Field  
43 paradigm in rodents, we describe the selection of factors specific to each experimental setup and the rating  
44 system, but also discuss the identification of additional general items that transcend categories and individual  
45 tests. Moreover, we present a working format of the PEERS prototype with its structured information  
46 framework for embedding data and critical back end/front end user functionalities. Here, PEERS not only  
47 offers users the possibility to search for information to facilitate experimental rigor, but also draws on the  
48 engagement of the scientific community to actively expand the information contained within the platform  
49 through a standardized approach to data curation and knowledge engineering.

50 As the database grows and benefits become more apparent, we will expand the scope of PEERS to any area  
51 of applied biomedical research.

52 Collectively, by helping scientists to search for specific factors relevant to their experiments, and to share  
53 experimental knowledge in a standardized manner, PEERS will serve as the ultimate exchange and analysis  
54 tool to enhance data validity and robustness as well as the reproducibility of preclinical research. PEERS  
55 offers a vetted, independent tool by which to judge the quality of information available on a certain test or  
56 model, identifies knowledge gaps and provides guidance on the key methodological considerations that  
57 should be prioritized to ensure that preclinical research is conducted to the highest standards and best  
58 practice.

### 59 **1. Introduction and rationale**

60 Biomedical research, particularly in the preclinical sphere, has been subject to scrutiny for the low levels of  
61 reproducibility that continue to persist across laboratories (Ioannidis, 2005). Reproducibility in this context  
62 refers to the ability to corroborate results of a previous study by conducting new experiments with the same  
63 experimental design but collecting new and independent data sets. Reproducibility checks are common in  
64 fields like physics (CERN Education, Communications and Outreach Group, 2018), but rarer in biological

## PEERS - Platform for the Exchange of Experimental Research Standards

65 disciplines such as neuroscience and pharmacotherapy, which are increasingly facing a ‘reproducibility  
66 crisis’ (Bespalov et al., 2016; Bespalov and Steckler, 2018; Botvinik-Nezer et al., 2020). Even though a high  
67 risk of failure to repeat experiments between laboratories is an inherent part of developing innovative  
68 therapies, some risks can be greatly reduced and avoided by adherence to evidence-based research practices  
69 using clearly identified measures to improve research rigor (Vollert et al., 2020; Bespalov et al., 2021;  
70 Emmerich et al., 2021). Alternative initiatives have been introduced to increase data reporting and  
71 harmonization across laboratories [ARRIVE 2.0 (Percie du Sert et al., 2020); EQUATOR network (Simera,  
72 2008); The International Brain Laboratory (International Brain Laboratory et al., 2017); FAIRsharing  
73 Information Resource (Sansone et al., 2019)], improve data management and analysis [(Pistoia Alliance  
74 Database (Makarov et al., 2021); NINDS Common Data Elements (Stone, 2010); FITBIR: Traumatic Brain  
75 Injury network (Tosetti et al., 2013); FITBIR: Preclinical Traumatic Brain Injury Common Data Elements  
76 (LaPlaca et al., 2021)], or publish novel methods and their refinements (Norecopa; Current Protocols in  
77 Neuroscience; protocols.io; The Journal of Neuroscience Methods). However, extrinsic and intrinsic factors  
78 that affect study outcomes in biomedical research have not yet been systematically considered or weighted  
79 and are the subject of ‘PEERS’ (Platform for the Exchange of Experimental Research Standards). This  
80 makes PEERS a unique addition to this eclectic list of well-established resources.

81 The rationale for PEERS is as follows: Laboratory workflows and preclinical models have become  
82 increasingly diverse and complex. Although the mechanics of many experimental paradigms are well  
83 explored and usually repeatable across laboratories and even across national/continental boundaries  
84 (Robinson et al., 2018; Aguillon-Rodriguez et al., 2021), data can be highly variable and are often  
85 inconsistent. Multiple attempts have been made to overcome this issue, but even efforts in which  
86 experimental conditions were fully standardized between laboratories have not been completely successful.  
87 This may not be surprising given that behavioral testing, for example, is sensitive to environmental factors  
88 such as housing conditions (background noise, olfactory cues), experimenter interactions, sex or the strain  
89 under investigation (Sousa et al., 2006; Bohlen et al., 2014; Riedel et al., 2018; Pawluski et al., 2020;  
90 Butlen-Ducuing et al., 2021). Many multi-laboratory studies have also observed significant differences  
91 between mouse strains and interactions of genotype x laboratory despite efforts to rigorously standardize  
92 both housing conditions and experimental design (Wolfer et al., 2004; Richter et al., 2011). Taking together,  
93 there are many variables/factors that can affect an experiment and the outcome of a study.

94 A proper catalogue of these influencing factors, including the scientific evidence combined with a rating of  
95 its strength, is missing to date and PEERS seeks to fill this gap and aims to guide scientists by advising  
96 which factors need to be monitored, recorded or reported. Figure 1 represents the overarching concept of the  
97 PEERS platform (Fig. 1).

98 ----

99 Fig. 1 about here

100 ----

101

## 102 2. The PEERS Solution

103 To mitigate some of the above issues, we have developed PEERS, an open-access online platform that seeks  
104 to aid scientists in determining which experimental factors (or variables) most likely affect the outcome of a  
105 specific test, model or assay and therefore deserve consideration *prior* to study design, execution and  
106 reporting. Our overarching ambition is to develop PEERS into a *one-stop exchange and reporting tool* for

## PEERS - Platform for the Exchange of Experimental Research Standards

107 extrinsic and intrinsic factors underlying variability in study outcomes and thereby undermining scientific  
108 progress. At the same time, PEERS offers a vetted, independent perspective by which the quality of  
109 information available on a certain test or model can be judged. It will also identify knowledge gaps and  
110 provide guidance on key methodological considerations that should be prioritized to ensure that preclinical  
111 research is conducted to the highest standards and incorporates best practice.

### 112 2.1. The PEERS Consortium

113 The PEERS project can be traced back to the Preclinical Data Forum (PDF)  
114 (<https://www.preclinicaldataforum.org/>), a network financially and organizationally supported by the  
115 European College of Neuropsychopharmacology (ECNP) and Cohen Veterans Bioscience (CVB). The PDF  
116 focuses on robustness, reproducibility, translatability and transparency of reporting preclinical data and  
117 consists of a multinational consortium of specialist researchers from research institutions, universities,  
118 pharma companies, SMEs and publishers. Originating from the PDF, the PEERS Working Group (AS, CD,  
119 CFB, AH, KK, MJK, NK, KP, GR, CHE) is currently funded by CVB during its initiation phase. The  
120 Working Group consists broadly of the ‘scientific arm’ with long-standing expertise in neuroscience,  
121 reproducibility and improvements in data quality across academic and industrial preclinical biomedical  
122 research. The ‘scientific arm’ of the group is complemented by the strong software and machine learning  
123 expertise of the ‘software arm’ which translates the scientific input provided into an easy to navigate open  
124 access platform.

125 Therefore, our initial focus is on *in vivo* and *in vitro* methods commonly utilized in neuroscience research.  
126 Since the inaugural meeting on 10 September 2020, the implementation of a principal concept was agreed,  
127 and partners have contributed to different work-packages.

### 128 2.2. How does PEERS work?

#### 129 2.2.1 The PEERS database and its front and back-end functionalities

130 Figure 2 represents the overall structure of the platform with the front and back-end functionalities  
131 represented. The front end contains a data input module which allows registered users to add either new  
132 methods/models (here termed ‘**protocols**’) or provide add-on information to existing protocols, but also the  
133 data search and the data extraction modules to be used by a typical user for the examination of databases.  
134 The back end of the PEERS database contains the processes to collect and analyze information related to the  
135 selected protocols. The relevance of specific factors for the outcome of these protocols is analyzed based on  
136 a detailed scoring system, representing a central element of the PEERS working prototype. The different  
137 steps involved in setting up this platform are discussed in the following sections by following the 3Es  
138 identified in Fig. 1.

139 ----

140 Fig. 2 about here

141 ----

#### 142 2.2.1.1. Selection of *in vivo/in vitro* protocols

143 For the working prototype and as a proof-of-concept, four *in-vivo* and four *in vitro* protocols were identified,  
144 based on (1) how commonly they are used in neuroscience (and by extension the literature available on  
145 them), and (2) the expertise of the core group (see Table 1).

## PEERS - Platform for the Exchange of Experimental Research Standards

### 146 2.2.1.2. Selection of ‘factors’

147 The central elements of PEERS are the ‘factors’, defined as any aspect of a study that i) can affect the study  
148 outcome, and therefore, ii) information to incorporate them into the study design (e.g., ignore/control,  
149 monitor, report them) is required. Factors were divided into two categories: 1) generic factors relevant to all  
150 protocols (e.g., strain of animals) and 2) specific factors relevant to and affecting specific protocols only  
151 (e.g., water temperature for water maze) by utilizing expert opinion from within the PEERS consortium.  
152 Users of the platform can search for these factors depending on the protocols and outcomes they are  
153 interested in. Representative tables of factors for one *in vivo* (Open Field test) and one *in vitro* method  
154 (Western blotting) can be found in the Supplemental section (Table S1 and S2).

### 155 2.2.1.3. Collection of references that report on selected ‘factors’ – **The Evidence**

156 To identify and collate references that study the importance of a specific factor for a selected protocol and its  
157 outcome, an extensive review of published literature via the PubMed and EMBASE databases was  
158 conducted. These included references dealing with either a factor of interest that had an effect on the  
159 protocol outcome or one that had no effect on the outcome when manipulated. A representative table of  
160 factors with references for the Open Field protocol can be found in the Supplemental section (Table S1).

### 161 2.2.2. Grading of Evidence: description of structured approach

162 Within the PEERS database, we provide references for each factor that has been scrutinized. We have gone  
163 one step further by providing a grading of the strength of this evidence (either positive or negative) so that  
164 examination of a specific factor in the database provides the user with an extracted summary of all relevant  
165 papers and their scores from one or more assessors (scorecards). This required the development of a generic  
166 ‘checklist’ to determine the quality of each paper the details of which are described in the following section.

#### 167 2.2.2.1. Checklist for grading of evidence/publications - **The Evaluation**

168 Concurrently with the identification of experimental factors and the review of literature, novel detailed  
169 ‘scorecards’ to evaluate the quality of scientific evidence were refined through multiple Delphi rounds  
170 within the PEERS Working Group. These contain a checklist with two main domains – *Methods* and *Results*.  
171 The elements of these domains were determined based on ARRIVE 2.0 ‘Essential 10’ and recommendations  
172 of the EQIPD consortium (Percie du Sert et al., 2020; Vollert et al., 2020). The *Methods* domain assesses the  
173 adherence to these guidelines with a maximum score of 10 (essentially one point for each of the 10 items –  
174 or fractions of 1 if items are only covered partially - or zero points if specific items are not covered at all).  
175 The *Results* domain meanwhile aims at evaluating the quality and suitability of the results and analyses, and  
176 again a score of 10 was awarded if all items were sufficiently addressed. The scorecards constitute a unique  
177 feature of the PEERS database because not only do they evaluate reporting of the methods in any paper but  
178 also take into account the suitability and strength of the results presented. Ideally, each reference is evaluated  
179 by two or more assessors to remove any source of bias. Table 2 depicts the checklist score utilized for the *in*  
180 *vivo* protocols.

181 Multiple scorecards (from different assessors) dealing with the same factor/reference as well as the  
182 overarching score derived from the description of methods and results are freely accessible on the PEERS  
183 platform for detailed information.

#### 184 2.2.2.2. Overall grading of evidence – **The Extraction**

## PEERS - Platform for the Exchange of Experimental Research Standards

185 Following on from the individual scoring of each paper, an algorithm commonly used for meta-analyses  
186 (Neyeloff et al., 2012) that quantifies the degree of reviewer consensus (heterogeneity of grading) was used  
187 to provide an adjusted grade for the extracted output taking together all scores of all reviewers.

188 This grading system was then simplified to establish the overall scores for each factor into high (>14/20) /  
189 medium (5-13/20) / low (<5/20) quality (or no evidence), which is then displayed for users on the front-end  
190 of the platform.

### 191 2.2.3. Platform users and contributors

192 All first-time users on the PEERS platform need to register and accept the PEERS Code of Conduct (CoC-  
193 see below in Section 3.1) in order to use PEERS. This includes a small profile page where users can fill in  
194 details of their present affiliation, level of expertise and areas of interest. This also allows the different users  
195 to be guided to areas of interest that match up with their profile. The platform will display the active users on  
196 the platform and will also show details of their involvement and contribution to different protocols (optional,  
197 only if desired). With time, these measurable contributions/metrics can be used by users to demonstrate their  
198 effort, time involvement and value.

199 Until a critical number of users is reached, the scoring of publications by new (and unexperienced) users will  
200 be moderated briefly by an experienced member of the PEERS Working Group. However, as mentioned in  
201 Section 2.2.2.1, the scorecard checklists are kept as simple and intuitive as possible (e.g. by adhering to the  
202 ARRIVE 2.0 guidelines for methods reporting) so that scoring of publications is neither time-consuming nor  
203 difficult.

204 Once registered, users can ask questions about the relevance of specific factors by interacting with the ‘Data  
205 Search Module’ (Fig. 2). Additionally, they can also contribute to the reviewing and scoring of references  
206 using the ‘Data Input Module’. Ultimately, PEERS extracts an output for the user summarizing the ‘status’  
207 of the factor of interest and detailing the scientific strength available that the factor may indeed influence the  
208 design, conduct and reporting phase of the protocol of choice.

### 209 2.3. Description of the PEERS prototype

210 The current PEERS prototype consists of a web application such that any expert, after registration, may  
211 insert data and review any existing protocol datasets. By implementing a relational schema, provisions have  
212 been made for easy data transformation using semi-structured formats such as JSON and XML, so they are  
213 ready for sharing with other applications or systems through an Application Programming Interface (API).  
214 The central entities to be collected and stored in the PEERS database are the *in vivo* and *in vitro* protocols  
215 including all related factors, references, and scorecards. The prototype is set up using the popular ReactJS  
216 library with a simple and effective design provided by the Semantic UI framework, while data are managed  
217 and stored through CVB’s *BRAINS Commons* platform, a cloud-based platform for computational discovery  
218 across brain disease. The Minimum Viable Product (MVP) includes a user management, authentication, and  
219 authorization module so that the access/contributions of each user can be tracked and presented in the final  
220 dataset. This feature facilitates implementation of collaborative elements which PEERS seeks to integrate.  
221 The application will be accessible using any web browser via the following link:  
222 <https://www.braincommons.org/peers-platform/>.

### 223 2.4. An example: The ‘Open Field’ protocol

## PEERS - Platform for the Exchange of Experimental Research Standards

224 The following example demonstrates how the different back-end functionalities of PEERS will translate into  
225 the front-end ‘Extracted Output’ displayed on the PEERS platform when users aim to retrieve information  
226 about specific factors for the Open Field *in vivo* protocol (Fig. 3).

227 Accessing the Open Field test for the first time, users of PEERS might want to ask the question: ‘*Do the*  
228 *factors ‘Sex’ (generic) and ‘Illumination level of arena’ (specific) affect the outcome of the Open Field test?’*

- 229 a) As a first step, users accessing the platform can input their query into the search module such as:  
230 Will the factor ‘Sex’ affect the outcome of an Open Field test? or Will the factor ‘Illumination level  
231 of arena’ affect the outcome of an Open Field test? and click *Search*. All factors and tests will be  
232 displayed in drop-down menus.
- 233 b) Subsequently, the PEERS database will i) locate all the factors pertaining to the Open Field protocol  
234 and will select ‘Sex’ or ‘Illumination level of arena’ from these, ii) generate the list of references  
235 (via DOIs) for the two factors, iii) provide scorecards scored by reviewers for each of the references,  
236 (iv) use the mathematical model to resolve any discrepancies between reviewers/multiple references,  
237 and (v) generate the overall extracted output of the evidence for ‘Sex’ or ‘Illumination level of  
238 Arena’ as either high (>14/20) / medium (5-13/20) / low (<5/20) quality (or no evidence).
- 239 c) The extracted output status of the two factors will then be visualized as ‘HIGH’ in this case -  
240 meaning that it is highly likely that both factors ‘Sex’ and ‘Illumination level of arena’ can affect the  
241 outcome of the Open Field paradigm. To ensure full transparency, users will also have access to all  
242 scorecards and related references for each of the papers scored and can follow each step to  
243 understand how the overall grading of evidence was achieved.

244

245 ----

246 Fig. 3 about here

247 ----

248

### 249 **3. Future directions and outlook**

250

#### 251 **3.1. Proposed curation mechanisms and community engagement**

252

##### 253 3.1.1. Wiki-like functionality

254 To involve the scientific community at large in building and growing the PEERS database, a wiki-like  
255 functionality is adopted to allow the collaborative modification and addition of content and structure. The  
256 wiki concept ensures that all stakeholders (including early career researchers – PhD students; research  
257 assistants and fellows – and established professionals) can actively participate in the curation and reviewing  
258 process of evidence pertaining to a protocol using a standardized approach to evaluating the evidence. The  
259 presence of multiple reviewers for each factor and protocol will ensure that there is no bias while the meta-  
260 analysis approach described above will be utilized to resolve any disagreement between reviewers and adjust  
261 the strength of evidence should new information become available.

262 Editing, curating, and maintaining the PEERS platform is integral to the process and the Working Group is  
263 proposing several measures to credit any contributor to the review/editing/curating process. Some of these

## PEERS - Platform for the Exchange of Experimental Research Standards

264 proposals include making PEERS recommendations citable like conventional publications or developing the  
265 platform such that contributors' names appear on protocols they have contributed to. In addition to voluntary  
266 contributions, qualified staff will ensure maintenance, quality management of the content on the database,  
267 sustainability and project management functionalities where needed.

### 268 3.1.2. Governance: The PEERS Code of Conduct

269 The PEERS platform aims to be a community-driven resource which will be curated and updated regularly  
270 in an open fashion. We expect biomedical researchers from both academia and industry all over the world to  
271 be members and contributors of this community. Above all, we would expect this community to be  
272 respectful and engaged so we can reach a broader audience and be helpful to scientists at different stages of  
273 their career and in different research environments. Therefore, we will implement a PEERS Code of Conduct  
274 (CoC) and all users will have to accept the PEERS CoC before becoming contributors or active users. The  
275 CoC will be formulated as a guide to make the community-driven nature of the platform productive and  
276 welcoming.

277 However, violations of the CoC will affect the user's ability to contribute to the PEERS database and to  
278 score papers and engage with the wider PEERS community. Often users will be scoring the quality of  
279 methods and results presented in a scientific paper and these are bound to have consequences for other users,  
280 colleagues or authors of that paper and therefore, it is important to be respectful, fair and open. Users must  
281 not allow any personal prejudices or preferences to overshadow the scoring of any papers and must judge a  
282 paper purely on the content presented in it.

283 If any disagreements do arise, they should be dealt with in a mature fashion and when possible, informally.  
284 However, if the informal processes seem inadequate to resolve any conflicts, PEERS will establish a  
285 structured procedure to deal with any complaints or report against any problematic users. The full CoC will  
286 be placed on the platform when it goes live.

287

### 288 3.1.3. Community engagement

289 In order to measure community engagement directly during the testing and validation phase of the platform,  
290 the so-called 'Voice of the Customer' approach was/is utilized. This is one of the most popular Agile  
291 techniques to capture product functionality as well as user needs and connects the PEERS platform directly  
292 with those who are likely to engage with it while also taking their valuable feedback on board. We aim to do  
293 this in various ways: (i) obtain user feedback following the product launch via succinct surveys and offer  
294 them an attractive opportunity to beta-test new protocols prior to release on the platform; (ii) interview users  
295 about their research problems, how they address them and how PEERS could aid their requirements; (iii)  
296 listen to users and implement new features and functionalities to the PEERS platform. This approach will  
297 help to identify the most vital protocols and facilitate the development of PEERS together with the user and  
298 maximize its usefulness. Initial feedback from end user interviews and a small survey suggests a willingness  
299 not only to use the PEERS platform to search for information but indeed also to act as a contributor to  
300 complete and update any relevant protocols.

301 Further, PEERS will establish its presence via social media websites (e.g. Researchgate, Twitter, LinkedIn  
302 and others) to update the scientific community regularly on new developments and to recruit reviewers for  
303 newly added protocols via 'call-to-action' announcements. Other indirect metrics to ensure the uptake and  
304 adoption of PEERS by the wider scientific community and measure success will employ popular  
305 mechanisms utilized by online publications such as the number of hits / user access for each protocol and



## PEERS - Platform for the Exchange of Experimental Research Standards

306 factor, the number of downloads of the evidence related to each factor and the number of downloads for the  
307 cited publications. Information will be graphically displayed on the platform and updated instantly. We can  
308 use this approach to identify a) popular protocols; b) protocols with low engagement; c) popular modes of  
309 engagement with the different protocols. Outcomes will identify areas of global interest for researchers who  
310 use the platform. Simultaneously, this information enables us to identify specific knowledge gaps and we  
311 will seek to close them.

### 312 **3.2. Long-term vision of full PEERS**

313 At present, given the short period of its existence, contents of the database is limited, but PEERS aims to  
314 upscale and expand by constantly adding new protocols. Given the composition of the Working Group, the  
315 list of protocols will be expanded to include other commonly employed, as well as newly developed  
316 neuroscience methods such as *in vivo/in vitro* electrophysiology, cell culture (2D+3D), optogenetics,  
317 elevated plus maze, qPCR, flow cytometry, light-dark box, conditioned fear etc. The database will continue  
318 to be curated and updated for already published protocols.

319 In the longer term, PEERS aims to attract a broader user base and therefore, the ambition is to branch out  
320 and include protocols from other biological disciplines such as infection, inflammation, immunity,  
321 cardiovascular sciences, microbial research, etc. Furthermore, the inclusion of expert unpublished data and  
322 information related to the importance of specific factors may also be warranted. However, strict rules would  
323 need to be set out to ensure proper management, quality control and utility of such unpublished data.

324 As one of the next steps to aid this expansion, we seek to establish a ‘Board of Editors’ of PEERS akin to an  
325 editorial board of a scientific journal, in which all biological disciplines will be represented. Novel protocols  
326 can be commissioned accordingly, and the wiki-like structure of the platform would then persist with the  
327 Board of Editors reviewing contributions to ensure the extraction of evidence for specific factors is  
328 appropriate. The members of the Board of Editors alongside the contributors will be displayed on the  
329 platform to make everyone’s contribution transparent.

330 Most importantly, as PEERS does not compete with existing initiatives for the reporting of results or with  
331 guidelines for scientific conduct, we envisage interactions with initiatives such as ARRIVE, EQUIPD, FAIR  
332 and others to be fruitful in increasing the quality and reproducibility of research in the future.

333

## PEERS - Platform for the Exchange of Experimental Research Standards

### 334 **Conflict of interest**

335 The authors have no conflict of interest to declare.

336 N.K. and C.D. have received honoraria and financial support from Janssen-Cilag, Lundbeck, Elpen S.A. and  
337 Medochemie S.A., which is not related or relevant to this work. Work of the laboratory of GR, but unrelated  
338 to this project, is currently funded by TauRx Pharmaceuticals. AB and CHE are employees and shareholders  
339 at PAASP GmbH and PAASP US LLC. AB is an employee and/or shareholder at Exciva GmbH, Synvanta  
340 LLC, Ritec Pharma. CFB is employed by Cohen Veterans Bioscience, which has funded the initial stages of  
341 the PEERS project development. MJP is an employee of EpiEndo Pharmaceutical EHF and previously of  
342 Fraunhofer IME-TMP and GSK. TS is an employee of Janssen Pharmaceutica.

### 343 **Author Contributions**

344 All members of the PEERS Working Group were involved in the preparation of this manuscript (with AS,  
345 CD, CFB, AH, MJK, NK, GR, CHE responsible for the scientific aspects ('scientific arm') and KK and KP  
346 responsible for the technical aspects ('software arm'). AS, GR and CHE were responsible for the main text  
347 of the manuscript, while CHE was responsible for the production of the figures. All other authors (AB, MJP,  
348 PP, TS) provided valuable input to early PEERS concepts and edits to the manuscript. All authors reviewed  
349 the final version of the manuscript.

### 350 **Funding**

351 The PEERS Consortium is currently funded by Cohen Veterans Bioscience Ltd and grants COH-0011 from  
352 Steven A. Cohen.

### 353 **Acknowledgements**

354 We would like to thank IJsbrand Jan Aalbersberg, Natasja de Bruin, Philippe Chamiot-Clerc, Anja Gilis,  
355 Lieve Heylen, Martine Hofmann, Patricia Kabitzke, Isabel Lefevre, Janko Samardzic, Susanne Schiffmann  
356 and Guido Steiner for their valuable input and discussions during the conceptualization of PEERS and the  
357 initial phase of the project.

358

### 359 **References**

- 360 Aguilon-Rodriguez, V., Angelaki, D., Bayer, H., Bonacchi, N., Carandini, M., Cazes, F., et al. (2021).  
361 Standardized and reproducible measurement of decision-making in mice. *Elife* 10.  
362 doi:10.7554/eLife.63711.
- 363 Bepalov, A., Bernard, R., Gilis, A., Gerlach, B., Guillen, J., Castagne, V., et al. (2021). Introduction to the  
364 EQIPD quality system. *Elife* 10. doi:10.7554/eLife.63294.
- 365 Bepalov, A., and Steckler, T. (2018). Lacking quality in research: Is behavioral neuroscience affected more  
366 than other areas of biomedical science? *J. Neurosci. Methods* 300, 4–9.  
367 doi:10.1016/j.jneumeth.2017.10.018.
- 368 Bepalov, A., Steckler, T., Altevogt, B., Koustova, E., Skolnick, P., Deaver, D., et al. (2016). Failed trials for  
369 central nervous system disorders do not necessarily invalidate preclinical models and drug targets. *Nat.*  
370 *Rev. Drug Discov.* 15, 516–516. doi:10.1038/nrd.2016.88.
- 371 Bohlen, M., Hayes, E. R., Bohlen, B., Bailoo, J. D., Crabbe, J. C., and Wahlsten, D. (2014). Experimenter  
372 effects on behavioral test scores of eight inbred mouse strains under the influence of ethanol. *Behav.*

## PEERS - Platform for the Exchange of Experimental Research Standards

- 373 *Brain Res.* 272, 46–54. doi:10.1016/j.bbr.2014.06.017.
- 374 Botvinik-Nezer, R., Holzmeister, F., Camerer, C. F., Dreber, A., Huber, J., Johannesson, M., et al. (2020).  
375 Variability in the analysis of a single neuroimaging dataset by many teams. *Nature* 582, 84–88.  
376 doi:10.1038/s41586-020-2314-9.
- 377 Butlen-Ducuing, F., Balkowiec-Iskra, E., Dalla, C., Slattery, D. A., Ferretti, M. T., Kokras, N., et al. (2021).  
378 Implications of sex-related differences in central nervous system disorders for drug research and  
379 development. *Nat. Rev. Drug Discov.* 2021. doi:10.1038/d41573-021-00115-6.
- 380 CERN Education, Communications and Outreach Group, 2018 (2018). CERN Annual report 2017. Geneva  
381 Available at: <http://cds.cern.ch/record/2624296>.
- 382 Emmerich, C. H., Gamboa, L. M., Hofmann, M. C. J., Bonin-Andresen, M., Arbach, O., Schendel, P., et al.  
383 (2021). Improving target assessment in biomedical research: the GOT-IT recommendations. *Nat. Rev.*  
384 *Drug Discov.* 20, 64–81. doi:10.1038/s41573-020-0087-3.
- 385 International Brain Laboratory, T., Abbott, L. F., Angelaki, D. E., Carandini, M., Churchland, A. K., Dan,  
386 Y., et al. (2017). An International Laboratory for Systems and Computational Neuroscience. *Neuron*  
387 96, 1213–1218. doi:10.1016/j.neuron.2017.12.013.
- 388 Ioannidis, J. P. A. (2005). Why most published research findings are false. *PLoS Med.* 2, e124.  
389 doi:10.1371/journal.pmed.0020124.
- 390 LaPlaca, M., Huie, J., Alam, H., Bachstetter, A., Bayir, H., Bellgowan, P., et al. (2021). Pre-Clinical  
391 Common Data Elements for Traumatic Brain Injury Research: Progress and Use Cases. *J.*  
392 *Neurotrauma* 38, 1399–1410. doi:10.1089/NEU.2020.7328.
- 393 Makarov, V. A., Stouch, T., Allgood, B., Willis, C. D., and Lynch, N. (2021). Best practices for artificial  
394 intelligence in life sciences research. *Drug Discov. Today* 26, 1107–1110.  
395 doi:10.1016/J.DRUDIS.2021.01.017.
- 396 Pawluski, J. L., Kokras, N., Charlier, T. D., and Dalla, C. (2020). Sex matters in neuroscience and  
397 neuropsychopharmacology. *Eur. J. Neurosci.* 52, 2423–2428. doi:10.1111/EJN.14880.
- 398 Percie du Sert, N., Hurst, V., Ahluwalia, A., Alam, S., Avey, M. T., Baker, M., et al. (2020). The ARRIVE  
399 guidelines 2.0: Updated guidelines for reporting animal research. *PLoS Biol.* 18, e3000410.  
400 doi:10.1371/journal.pbio.3000410.
- 401 Richter, S. H., Garner, J. P., Zipser, B., Lewejohann, L., Sachser, N., Touma, C., et al. (2011). Effect of  
402 Population Heterogenization on the Reproducibility of Mouse Behavior: A Multi-Laboratory Study.  
403 *PLoS One* 6, e16461. doi:10.1371/journal.pone.0016461.
- 404 Riedel, G., Robinson, L., and Crouch, B. (2018). Spatial learning and flexibility in 129S2/SvHsd and  
405 C57BL/6J mouse strains using different variants of the Barnes maze. *Behav. Pharmacol.* 29, 688–700.  
406 doi:10.1097/FBP.0000000000000433.
- 407 Robinson, L., Spruijt, B., and Riedel, G. (2018). Between and within laboratory reliability of mouse  
408 behaviour recorded in home-cage and open-field. *J. Neurosci. Methods* 300, 10–19.  
409 doi:10.1016/j.jneumeth.2017.11.019.
- 410 Sansone, S.-A., McQuilton, P., Rocca-Serra, P., Gonzalez-Beltran, A., Izzo, M., Lister, A. L., et al. (2019).  
411 FAIRsharing as a community approach to standards, repositories and policies. *Nat. Biotechnol.* 2019  
412 374 37, 358–367. doi:10.1038/s41587-019-0080-8.
- 413 Simera, I. (2008). The EQUATOR Network: facilitating transparent and accurate reporting of health  
414 research. *Serials* 21, 183–187. doi:10.1629/21183.

## PEERS - Platform for the Exchange of Experimental Research Standards

- 415 Sousa, N., Almeida, O. F. X., and Wotjak, C. T. (2006). A hitchhiker's guide to behavioral analysis in  
416 laboratory rodents. *Genes, Brain Behav.* 5, 5–24. doi:10.1111/j.1601-183X.2006.00228.x.
- 417 Stone, K. (2010). NINDS common data element project: a long-awaited breakthrough in streamlining trials.  
418 *Ann. Neurol.* 68. doi:10.1002/ANA.22114.
- 419 Tosetti, P., Hicks, R. R., Theriault, E., Phillips, A., Koroshetz, W., and Draghia-Akli, R. (2013). Toward an  
420 International Initiative for Traumatic Brain Injury Research. *J. Neurotrauma* 30, 1211.  
421 doi:10.1089/NEU.2013.2896.
- 422 Vollert, J., Schenker, E., Macleod, M., Bernalov, A., Wuerbel, H., Michel, M., et al. (2020). Systematic  
423 review of guidelines for internal validity in the design, conduct and analysis of preclinical biomedical  
424 experiments involving laboratory animals. *BMJ Open Sci.* 4. doi:10.1136/bmjos-2019-100046.
- 425 Wolfer, D. P., Litvin, O., Morf, S., Nitsch, R. M., Lipp, H. P., and Würbel, H. (2004). Cage enrichment and  
426 mouse behaviour. *Nature* 432, 821–822. doi:10.1038/432821a.

427  
428

### 429 **Figure legends**

430 **Figure 1:** Outline of the PEERS concept and workflow (the 3Es). To understand whether specific factors are  
431 relevant for certain methods/models ('protocols'), the PEERS workflow is based on different steps to a)  
432 collect information about selected factors/protocols from publications or the scientific community  
433 ('**Evidence**'); b) rate the strength of this information and provide mechanisms for editing, curating and  
434 maintaining the information/database ('**Evaluation**'); and c) present the outcome in a user-friendly and  
435 digestible form ('**Extraction Output**') so that users will be provided with an answer helpful for their planned  
436 experiments.

437 **Figure 2:** PEERS platform structure. Users can interact with the PEERS platform (blue arrows) by searching  
438 for or adding information (Front End Modules). The PEERS database (Back End) consists of various  
439 protocols, for which generic and specific factors and related references have been identified. The Quality of  
440 Evidence for the importance of certain factors is evaluated using scorecards and a summary is presented by  
441 visualizing results in the user interface. Users can contribute by adding new protocols or factors and by  
442 scoring relevant references (green arrows).

443 **Figure 3:** The 'Open Field' protocol example, demonstrating how the different back-end functionalities of  
444 PEERS will translate into the 'Extracted Output', presented to PEERS users. A search query for a specific  
445 factor/protocol will lead to the selection of all relevant references from the PEERS database dealing with the  
446 factor of interest (e.g., the 'illumination level of the arena'). Based on the scorecards for these references the  
447 combined score is calculated which translates into the overall extracted output for the selected  
448 factor/protocol combination. This status is then presented to the user. Users also have access to all  
449 scorecards to understand how the overall grading of evidence was achieved.

450

451

**PEERS - Platform for the Exchange of Experimental Research Standards**

452 **Tables**

453 **Table 1: The four initial *in vivo* and *in vitro* neuroscience protocols selected for the PEERS platform**

| <b>IN VIVO</b>                      | <b>IN VITRO</b>         |
|-------------------------------------|-------------------------|
| <b>Open Field</b>                   | <b>Western blotting</b> |
| <b>Water Maze</b>                   | <b>PCR</b>              |
| <b>EEG</b>                          | <b>ELISA</b>            |
| <b>Conditioned Place Preference</b> | <b>Calcium Imaging</b>  |

454

455

**PEERS - Platform for the Exchange of Experimental Research Standards**

456 **Table 2: ‘Scorecard’ containing checklist for the *in vivo* protocols**

| <b>METHODS DOMAIN - BASED ON ‘ESSENTIAL 10’ OF ARRIVE 2.0</b> |                                                                                                                                                                                                                                                                                                                                                                                                                                                       | <b>SCORE</b>         |
|---------------------------------------------------------------|-------------------------------------------------------------------------------------------------------------------------------------------------------------------------------------------------------------------------------------------------------------------------------------------------------------------------------------------------------------------------------------------------------------------------------------------------------|----------------------|
|                                                               |                                                                                                                                                                                                                                                                                                                                                                                                                                                       | <b>(max 10)</b>      |
| <b><i>Study design</i></b>                                    | <b>1</b> For each experiment, are brief details of study design provided, including:<br><br>a. The groups being compared, including control groups? If no control group has been used, is the rationale stated?<br><br>b. The experimental unit (e.g. a single animal, litter, or cage of animals)?                                                                                                                                                   | min: 0<br><br>max: 1 |
| <b><i>Sample Size</i></b>                                     | <b>2</b> a. Are the exact number of experimental units allocated to each group, and the total number in each experiment mentioned?<br><br>b. Is the sample size provided and the rationale for it?                                                                                                                                                                                                                                                    | min: 0<br><br>max: 1 |
| <b><i>Inclusion and exclusion criteria</i></b>                | <b>3</b> a. Were all criteria used for including and excluding animals (or experimental units) during the experiment, and data points during the analysis mentioned? Were these mentioned a priori and if not, was this stated in the paper?<br><br>b. If any animals or data points or experimental units were excluded, was this reported and explained?<br><br>c. For each analysis, was the exact value of n in each experimental group reported? | min: 0<br><br>max: 1 |
| <b><i>Randomization</i></b>                                   | <b>4</b> a. Was randomization used to allocate experimental units to control and treatment groups? If done, was the method mentioned?<br><br>b. Was the strategy used to minimize potential confounders such as the order of treatments and measurements, or animal/cage location mentioned? If confounders were not controlled was this stated explicitly?                                                                                           | min: 0<br><br>max: 1 |
| <b><i>Blinding</i></b>                                        | <b>5</b> Was blinding done during the allocation, the conduct of the experiment, the outcome assessment, and the data analysis and if so how?                                                                                                                                                                                                                                                                                                         | min: 0<br><br>max: 1 |
| <b><i>Outcome measures</i></b>                                | <b>6</b> a. Have all outcome measures assessed been mentioned? (e.g. cell death, molecular markers, or behavioral changes)?<br><br>b. For hypothesis-testing studies, has the primary outcome measure, i.e. the outcome measure that was used to determine the sample size been mentioned?                                                                                                                                                            | min: 0<br><br>max: 1 |
| <b><i>Statistical methods</i></b>                             | <b>7</b> a. Have all details of the statistical methods used for each analysis, including software used been provided?<br><br>b. Were any methods used to assess whether the data met the assumptions of the statistical approach described, and what was done if the assumptions were not met?                                                                                                                                                       | min: 0<br><br>max: 1 |
| <b><i>Experimental animals</i></b>                            | <b>8</b> a. Were species-appropriate details of the animals used, including species, strain and substrain, sex, age or developmental stage, and, if relevant, weight described?<br><br>b. Was further relevant information on the provenance of animals, health/immune status, genetic modification status, genotype, and any previous procedures etc. mentioned?                                                                                     | min: 0<br><br>max: 1 |
| <b><i>Experimental procedures</i></b>                         | <b>9</b> For each experimental group, including controls, were experimental procedures mentioned in enough detail to allow others to replicate them, including:<br><br>a. What was done, how it was done and what was used?                                                                                                                                                                                                                           | min: 0<br><br>max: 1 |

**PEERS - Platform for the Exchange of Experimental Research Standards**

|                                                                    |           |                                                                                                                                                                                                                                                                                                                                           |                             |
|--------------------------------------------------------------------|-----------|-------------------------------------------------------------------------------------------------------------------------------------------------------------------------------------------------------------------------------------------------------------------------------------------------------------------------------------------|-----------------------------|
|                                                                    |           | <p>b. When and how often?</p> <p>c. Where (including detail of any acclimatization periods)?</p> <p>d. Why (provide rationale for procedures)?</p>                                                                                                                                                                                        |                             |
| <b>Result</b>                                                      | <b>10</b> | <p>For each experiment conducted, including independent replications, were:</p> <p>a. Summary/descriptive statistics for each experimental group, with a measure of variability where applicable (e.g. mean and SD, or median and range) reported?</p> <p>b. If applicable, was the effect size with a confidence interval mentioned?</p> | <p>min: 0</p> <p>max: 1</p> |
| <b>RESULTS DOMAIN -BASED ON APPROPRIATE INTERPRETATION OF DATA</b> |           |                                                                                                                                                                                                                                                                                                                                           | <b>SCORE</b>                |
|                                                                    |           |                                                                                                                                                                                                                                                                                                                                           | <b>(max 10)</b>             |
| <b>Data interpretation and analysis</b>                            | <b>1</b>  | How appropriate was the data and statistical analysis performed and reported in results?                                                                                                                                                                                                                                                  | <p>min: 0</p> <p>max: 5</p> |
|                                                                    | <b>2</b>  | How appropriate and suitable were the conclusions and inferences made?                                                                                                                                                                                                                                                                    | <p>min: 0</p> <p>max: 5</p> |

457

458

**PEERS - Platform for the Exchange of Experimental Research Standards**

459

460 **Supplementary Information**

461 **Table S1: Table of factors with references embedded for the Open Field protocol**

| <b>Category</b>               | <b>Factor</b>                                                              | <b>Literature/Reference</b>                                                                                                                                                                                                      |                                                                                                                                                                              |
|-------------------------------|----------------------------------------------------------------------------|----------------------------------------------------------------------------------------------------------------------------------------------------------------------------------------------------------------------------------|------------------------------------------------------------------------------------------------------------------------------------------------------------------------------|
| <b>Generic - Design Rigor</b> | Establishing whether an experiment informs a formal knowledge claim or not |                                                                                                                                                                                                                                  |                                                                                                                                                                              |
|                               | Blinding during experiment and during outcome assessment and analysis      | 10.1186/1744-9081-7-48                                                                                                                                                                                                           |                                                                                                                                                                              |
|                               | Randomization of allocation and documentation of method used               |                                                                                                                                                                                                                                  |                                                                                                                                                                              |
|                               | Sample size and rationale behind sample size                               |                                                                                                                                                                                                                                  |                                                                                                                                                                              |
|                               | Criteria for outliers                                                      |                                                                                                                                                                                                                                  |                                                                                                                                                                              |
|                               | Inclusion and exclusion criteria or data censoring                         | <a href="https://doi.org/10.3389/fneur.2020.00650">10.3389/fneur.2020.00650</a>                                                                                                                                                  |                                                                                                                                                                              |
|                               | Matching or balancing sex of animals/treatment of allocation               | 10.1186/1744-9081-7-48                                                                                                                                                                                                           |                                                                                                                                                                              |
|                               | Addressing confounds with treatment/setting/co-morbidities                 |                                                                                                                                                                                                                                  |                                                                                                                                                                              |
|                               | <b>Generic - <i>in vivo</i>- Subjects</b>                                  | Age                                                                                                                                                                                                                              | <a href="https://doi.org/10.2466/pms.1977.45.3f.1059">https://doi.org/10.2466/pms.1977.45.3f.1059</a><br><a href="https://doi.org/10.1002/npr2.12052">10.1002/npr2.12052</a> |
|                               |                                                                            | Body Weight                                                                                                                                                                                                                      | 10.3390/ani6010004                                                                                                                                                           |
| 10.1258/002367796780744901    |                                                                            |                                                                                                                                                                                                                                  |                                                                                                                                                                              |
| 10.1007/s11011-017-0140-z     |                                                                            |                                                                                                                                                                                                                                  |                                                                                                                                                                              |
| Strain - incl. Substrain      |                                                                            | 10.1007/s10517-015-2821-0                                                                                                                                                                                                        |                                                                                                                                                                              |
|                               |                                                                            | <a href="https://doi.org/10.1538/expanim.60.111">10.1538/expanim.60.111</a>                                                                                                                                                      |                                                                                                                                                                              |
| Breeder                       |                                                                            | <a href="https://www.frontiersin.org/articles/10.3389/fnins.2015.00424/full">https://www.frontiersin.org/articles/10.3389/fnins.2015.00424/full</a>                                                                              |                                                                                                                                                                              |
|                               |                                                                            | <a href="https://doi.org/10.1016/j.physbeh.2012.12.019">https://doi.org/10.1016/j.physbeh.2012.12.019</a>                                                                                                                        |                                                                                                                                                                              |
| Transport from Breeder        |                                                                            |                                                                                                                                                                                                                                  |                                                                                                                                                                              |
|                               |                                                                            | Standardisation of husbandry practice                                                                                                                                                                                            | 10.1111/gbb.12149                                                                                                                                                            |
|                               |                                                                            | <a href="https://doi.org/10.1016/j.neuroscience.2013.02.012">https://doi.org/10.1016/j.neuroscience.2013.02.012</a><br><a href="https://doi.org/10.1016/j.physbeh.2017.01.012">https://doi.org/10.1016/j.physbeh.2017.01.012</a> |                                                                                                                                                                              |



## PEERS - Platform for the Exchange of Experimental Research Standards

|                                                                  |                                                                                                                                                                                                                                                                                                                                                                                                                                                                                                                                                                                                                                                                                                                                    |
|------------------------------------------------------------------|------------------------------------------------------------------------------------------------------------------------------------------------------------------------------------------------------------------------------------------------------------------------------------------------------------------------------------------------------------------------------------------------------------------------------------------------------------------------------------------------------------------------------------------------------------------------------------------------------------------------------------------------------------------------------------------------------------------------------------|
|                                                                  | 04.009                                                                                                                                                                                                                                                                                                                                                                                                                                                                                                                                                                                                                                                                                                                             |
|                                                                  | 10.1111/j.1601-183X.2005.00121.x                                                                                                                                                                                                                                                                                                                                                                                                                                                                                                                                                                                                                                                                                                   |
| Acclimatization to holding facility prior to experimentation     |                                                                                                                                                                                                                                                                                                                                                                                                                                                                                                                                                                                                                                                                                                                                    |
| Sex                                                              | <a href="https://doi.org/10.1016/S0031-9384(01)00494-2">https://doi.org/10.1016/S0031-9384(01)00494-2</a><br><a href="https://doi.org/10.1002/ajmg.c.31565">https://doi.org/10.1002/ajmg.c.31565</a><br><a href="https://doi.org/10.1016/j.neuroscience.2013.02.012">https://doi.org/10.1016/j.neuroscience.2013.02.012</a><br><a href="https://doi.org/10.1016/j.bbr.2011.03.038">10.1016/j.bbr.2011.03.038</a>                                                                                                                                                                                                                                                                                                                   |
| Estrous cycle                                                    | <a href="https://doi.org/10.1111/j.1467-9450.1994.tb00946.x">10.1111/j.1467-9450.1994.tb00946.x</a><br><a href="https://doi.org/10.1016/S0031-9384(01)00494-2">https://doi.org/10.1016/S0031-9384(01)00494-2</a><br><a href="https://doi.org/10.1111/j.1601-183X.2006.00249.x">https://doi.org/10.1111/j.1601-183X.2006.00249.x</a>                                                                                                                                                                                                                                                                                                                                                                                                |
| Gonadal Hormones                                                 | <a href="https://doi.org/10.1016/j.psyneuen.2017.10.007">10.1016/j.psyneuen.2017.10.007</a><br><a href="https://doi.org/10.1016/j.yhbeh.2008.10.010">10.1016/j.yhbeh.2008.10.010</a><br><a href="https://doi.org/10.1016/S0006-8993(02)03567-9">10.1016/S0006-8993(02)03567-9</a><br><a href="https://doi.org/10.1016/S0306-4522(98)00341-8">10.1016/S0306-4522(98)00341-8</a><br><a href="https://doi.org/10.1037/a0012749">10.1037/a0012749</a><br><a href="https://doi.org/10.1016/S0003-3472(72)80145-3">10.1016/S0003-3472(72)80145-3</a><br><a href="https://doi.org/10.1037/0735-7044.118.2.306">10.1037/0735-7044.118.2.306</a><br><a href="https://doi.org/10.1016/0031-9384(73)90124-8">10.1016/0031-9384(73)90124-8</a> |
| Weaning age                                                      | <a href="https://doi.org/10.1371/journal.pone.0167652">https://doi.org/10.1371/journal.pone.0167652</a>                                                                                                                                                                                                                                                                                                                                                                                                                                                                                                                                                                                                                            |
| Gut Microbiome                                                   | <a href="https://doi.org/10.1038/s41398-018-0240-5">10.1038/s41398-018-0240-5</a>                                                                                                                                                                                                                                                                                                                                                                                                                                                                                                                                                                                                                                                  |
| Specific Pathogen Free                                           | <a href="https://doi.org/10.1111/nmo.12110">10.1111/nmo.12110</a><br><a href="https://doi.org/10.1016/j.psyneuen.2014.01.014">10.1016/j.psyneuen.2014.01.014</a><br><a href="https://doi.org/10.1080/01616412.2019.1675021">10.1080/01616412.2019.1675021</a><br><a href="https://doi.org/10.1371/journal.pone.0201829">10.1371/journal.pone.0201829</a>                                                                                                                                                                                                                                                                                                                                                                           |
| Description of controls and their suitability for the experiment | <a href="https://doi.org/10.1073/pnas.0912955107">10.1073/pnas.0912955107</a><br><a href="https://doi.org/10.1371/journal.pbio.3000411">https://doi.org/10.1371/journal.pbio.3000411</a>                                                                                                                                                                                                                                                                                                                                                                                                                                                                                                                                           |

## PEERS - Platform for the Exchange of Experimental Research Standards

|                                         |                                                                    |                                                                                                   |
|-----------------------------------------|--------------------------------------------------------------------|---------------------------------------------------------------------------------------------------|
|                                         | Recording of physiological variables during experiment             | 10.1186/1744-9081-7-48                                                                            |
| <b>Generic- <i>in vivo</i>- Housing</b> | Home cage type (Size, Color, etc)                                  | 10.1016/j.physbeh.2005.01.008                                                                     |
|                                         |                                                                    | 10.1016/S0166-2236(00)01718-5                                                                     |
|                                         |                                                                    | <a href="https://doi.org/10.1016/S0006-8993(98)00735-5">10.1016/S0006-8993(98)00735-5</a>         |
|                                         | Home cage bedding type                                             | 10.1037/com0000147<br>10.1016/j.physbeh.2013.08.003                                               |
|                                         | Enrichment                                                         | <a href="https://doi.org/10.3389/fnbeh.2014.00257">https://doi.org/10.3389/fnbeh.2014.00257</a>   |
|                                         | Room Temperature                                                   | <a href="https://doi.org/10.1016/j.pbb.2006.10.005">10.1016/j.pbb.2006.10.005</a>                 |
|                                         | Room Humidity                                                      |                                                                                                   |
|                                         | Light intensity/type                                               | 10.1111/j.1601-183X.2005.00121.x                                                                  |
|                                         | Circadian Rhythm/Light Cycle                                       | 10.3791/51785                                                                                     |
|                                         |                                                                    | 10.18632/aging.100142                                                                             |
|                                         |                                                                    | 10.1016/j.bbr.2009.07.001                                                                         |
|                                         |                                                                    | 10.1016/j.neures.2007.06.1474                                                                     |
|                                         |                                                                    | <a href="https://doi.org/10.1034/j.1601-183x.2003.00002.x">10.1034/j.1601-183x.2003.00002.x</a>   |
|                                         | Acoustic noise (also radio)                                        | 10.1258/la.2009.0080098<br><a href="https://pubmed.ncbi.nlm.nih.gov/20587160/">PMID: 20587160</a> |
|                                         | Ultrasound noise                                                   |                                                                                                   |
|                                         | Vibration noise                                                    |                                                                                                   |
|                                         | Group or isolated housing                                          | 10.1111/j.1601-183X.2004.00106.x                                                                  |
|                                         |                                                                    | <a href="https://doi.org/10.3389/fnbeh.2014.00257">https://doi.org/10.3389/fnbeh.2014.00257</a>   |
|                                         |                                                                    | <a href="https://doi.org/10.1101/2020.04.28.066704">https://doi.org/10.1101/2020.04.28.066704</a> |
|                                         |                                                                    | 10.1016/s0278-5846(99)00081-0                                                                     |
|                                         | Food type and dispenser and if there were any restrictions on diet | 10.1002/brb3.708                                                                                  |
|                                         |                                                                    | 10.1016/j.physbeh.2005.06.013                                                                     |
|                                         |                                                                    | 10.1152/physiolgenomics.00018.2020                                                                |
|                                         |                                                                    | 10.1016/j.physbeh.2005.07.008                                                                     |

## PEERS - Platform for the Exchange of Experimental Research Standards

|                                           |                                                                    |                                                                                                             |
|-------------------------------------------|--------------------------------------------------------------------|-------------------------------------------------------------------------------------------------------------|
|                                           |                                                                    | 10.1016/j.brainres.2012.06.004                                                                              |
|                                           |                                                                    | 10.3390/ani6010004                                                                                          |
|                                           |                                                                    | 10.1007/s11011-017-0140-z                                                                                   |
|                                           |                                                                    | 10.1016/j.neulet.2018.01.025                                                                                |
|                                           | Food type of dams before conception, during gestation or lactation | 10.1016/j.neuroscience.2013.02.044                                                                          |
|                                           |                                                                    | 10.1016/j.psyneuen.2015.10.020                                                                              |
|                                           |                                                                    | 10.1016/j.neuint.2010.04.009                                                                                |
|                                           |                                                                    | 10.1016/j.bbr.2008.03.021                                                                                   |
|                                           |                                                                    | 10.1080/1028415X.2017.1354958                                                                               |
|                                           | Cleaning frequency, bedding transfer                               | <a href="#">10.1258/la.2009.0080098</a>                                                                     |
|                                           | IVC/isolator or open cages                                         | 10.1016/j.physbeh.2013.10.019                                                                               |
|                                           |                                                                    | 10.1111/gbb.12564                                                                                           |
|                                           |                                                                    | <a href="#">10.3390/ani10040746</a>                                                                         |
| <b>Generic- <i>in vivo</i> - Handling</b> | Sex of Experimenter                                                | <a href="#">10.1038/nmeth.2935</a>                                                                          |
|                                           | Lab policy on use of perfume/skin care                             |                                                                                                             |
|                                           | Researcher experienced/not                                         | 10.1111/j.1601-183X.2005.00121.x                                                                            |
|                                           |                                                                    | <a href="#">10.1016/j.bbr.2014.06.017</a>                                                                   |
|                                           | Stress history of the animal (early life/chronic/acute etc.)       | 10.1097/WNR.0000000000000243                                                                                |
|                                           |                                                                    | 10.1016/0149-7634(81)90005-1                                                                                |
|                                           |                                                                    | <a href="#">10.1016/j.neuroscience.2005.06.068</a>                                                          |
|                                           | Habituation to handling                                            | <a href="https://doi.org/10.1016/S0091-3057(97)00502-9">https://doi.org/10.1016/S0091-3057(97)00502-9</a>   |
|                                           |                                                                    | <a href="https://doi.org/10.1016/S0091-3057(02)00789-X">https://doi.org/10.1016/S0091-3057(02)00789-X</a>   |
|                                           |                                                                    | <a href="https://doi.org/10.1038/s41598-020-60530-4">https://doi.org/10.1038/s41598-020-60530-4</a>         |
|                                           | Handling method                                                    | <a href="#">10.1037/com0000147</a>                                                                          |
| <b>Test conditions</b>                    |                                                                    |                                                                                                             |
| <b>Test room</b>                          | Temperature                                                        | 10.1016/j.jtherbio.2019.102458                                                                              |
|                                           |                                                                    | <a href="https://doi.org/10.1016/j.applanim.2016.08.005">https://doi.org/10.1016/j.applanim.2016.08.005</a> |
|                                           | Humidity                                                           | <a href="#">10.3791/51785</a>                                                                               |

## PEERS - Platform for the Exchange of Experimental Research Standards

|                                |                                                                  |                                                                                                                                                                                                                                                                                                                                                                                                         |
|--------------------------------|------------------------------------------------------------------|---------------------------------------------------------------------------------------------------------------------------------------------------------------------------------------------------------------------------------------------------------------------------------------------------------------------------------------------------------------------------------------------------------|
|                                | Background noise level                                           | 10.1177/0023677217711966<br><br><a href="https://doi.org/10.1111/j.2044-8295.1971.tb02034.x">https://doi.org/10.1111/j.2044-8295.1971.tb02034.x</a><br><br><a href="https://doi.org/10.1016/0376-6357(94)90011-6">10.1016/0376-6357(94)90011-6</a>                                                                                                                                                      |
|                                | Illumination Level                                               | <a href="https://doi.org/10.1016/j.applanim.2016.08.005">https://doi.org/10.1016/j.applanim.2016.08.005</a><br><br><a href="https://link.springer.com/article/10.1007%2FBF00572269">https://link.springer.com/article/10.1007%2FBF00572269</a><br><br>10.1016/j.brainresbull.2006.12.009<br><br><a href="https://doi.org/10.1016/0031-9384(94)00317-3">https://doi.org/10.1016/0031-9384(94)00317-3</a> |
|                                | Odour                                                            | <a href="https://doi.org/10.1016/S0091-6773(72)80214-1">10.1016/S0091-6773(72)80214-1</a>                                                                                                                                                                                                                                                                                                               |
|                                | Cleaning agents (type, concentration, and frequency of cleaning) | <a href="https://doi.org/10.3791/51785">10.3791/51785</a>                                                                                                                                                                                                                                                                                                                                               |
|                                | Time of testing (morning vs afternoon)                           | 10.1037/a0021200<br><br><a href="https://doi.org/10.1038/s41598-019-44705-2">https://doi.org/10.1038/s41598-019-44705-2</a><br><br><a href="https://doi.org/10.3389/fphar.2019.00237">10.3389/fphar.2019.00237</a>                                                                                                                                                                                      |
|                                | Frequency of testing                                             | 10.2466/pms.1998.86.3c.1179<br><br>10.1016/j.bbr.2011.11.042<br><br>10.2466/pms.1998.86.3c.1179<br><br>10.1111/j.2044-8295.1972.tb01312.x<br><br><a href="https://doi.org/10.1016/S0003-3472(73)80047-8">10.1016/S0003-3472(73)80047-8</a>                                                                                                                                                              |
|                                | Transportation from holding facility                             | <a href="https://doi.org/10.1258/la.2009.0080098">10.1258/la.2009.0080098</a> ;                                                                                                                                                                                                                                                                                                                         |
|                                | Acclimatization to test room and duration of test                | <a href="https://doi.org/10.1371/journal.pone.0048414">https://doi.org/10.1371/journal.pone.0048414</a>                                                                                                                                                                                                                                                                                                 |
|                                | Bedding material in the test box                                 | <a href="https://doi.org/10.1016/j.pbb.2010.05.013">10.1016/j.pbb.2010.05.013</a>                                                                                                                                                                                                                                                                                                                       |
| <b>Administration of drugs</b> | Name and type of drug                                            | 10.1016/S0014-2999(03)01272-X<br><br><a href="https://doi.org/10.1016/s0278-5846(99)00081-0">10.1016/s0278-5846(99)00081-0</a><br><br>10.1016/j.bbr.2014.06.017                                                                                                                                                                                                                                         |
|                                | Formulation of drug solution                                     |                                                                                                                                                                                                                                                                                                                                                                                                         |

## PEERS - Platform for the Exchange of Experimental Research Standards

|                                |                                                     |                                                                                                                                                                                                                                                                  |
|--------------------------------|-----------------------------------------------------|------------------------------------------------------------------------------------------------------------------------------------------------------------------------------------------------------------------------------------------------------------------|
|                                | Drug Naïve                                          | 10.1007/s002130050738<br>10.1016/j.neulet.2007.12.020<br>10.1016/j.peptides.2009.02.002<br>10.1016/j.alcohol.2017.04.005<br>10.1016/j.euroneuro.2015.10.002<br><a href="https://doi.org/10.2174/1570162x13666150121105221">10.2174/1570162x13666150121105221</a> |
|                                | Administration route                                | <a href="https://doi.org/10.1055/s-2006-941557">10.1055/s-2006-941557</a>                                                                                                                                                                                        |
|                                | Volume (ml/kg)                                      |                                                                                                                                                                                                                                                                  |
|                                | Vehicle and vehicle volume                          |                                                                                                                                                                                                                                                                  |
|                                | Frequency of dosing and dosing regimen              | <a href="https://doi.org/10.1017/S1461145711001283">10.1017/S1461145711001283</a><br>10.1016/s0024-3205(03)00612-x                                                                                                                                               |
| <b>Recording &amp; Scoring</b> | Video Angle                                         |                                                                                                                                                                                                                                                                  |
|                                | Time of Recording (similar to time of testing)      | <a href="https://doi.org/10.1038/s41598-019-44705-2">https://doi.org/10.1038/s41598-019-44705-2</a><br><a href="https://doi.org/10.3389/fphar.2019.00237">10.3389/fphar.2019.00237</a><br>10.1037/a0021200                                                       |
|                                | Duration of recording                               |                                                                                                                                                                                                                                                                  |
| <b>Data analysis</b>           | Software acquisition and analysis settings          | <a href="https://doi.org/10.1016/j.jneumeth.2017.05.026">10.1016/j.jneumeth.2017.05.026</a>                                                                                                                                                                      |
|                                | Manual/Automatic                                    | 10.4137/JCNSD.S13194<br>10.1038/s41386-020-0776-y                                                                                                                                                                                                                |
|                                | Analysis parameters                                 |                                                                                                                                                                                                                                                                  |
| <b>Statistical analysis</b>    | Multiple raters                                     | 10.1038/s41386-020-0776-y                                                                                                                                                                                                                                        |
|                                | Pre-defined statistical analysis                    | 10.1016/s0278-5846(99)00081-0<br><a href="https://doi.org/10.3389/fnbeh.2017.00026">10.3389/fnbeh.2017.00026</a>                                                                                                                                                 |
|                                | Appropriate choice of statistical method            | 10.1016/s0278-5846(99)00081-0                                                                                                                                                                                                                                    |
|                                | Definition of unit of analysis                      |                                                                                                                                                                                                                                                                  |
|                                | Precision of effect size                            |                                                                                                                                                                                                                                                                  |
| <b>Equipment</b>               | Apparatus Construction (floor surface, color, size) | <a href="https://doi.org/10.1152/physiolgenomics.90207.2008">https://doi.org/10.1152/physiolgenomics.90207.2008</a><br><a href="https://link.springer.com/article/10.1007%2FBF00572269">https://link.springer.com/article/10.1007%2FBF00572269</a>               |

## PEERS - Platform for the Exchange of Experimental Research Standards

|                          |                                                                                                                                                                                                                                                                         |
|--------------------------|-------------------------------------------------------------------------------------------------------------------------------------------------------------------------------------------------------------------------------------------------------------------------|
| Thermometer              |                                                                                                                                                                                                                                                                         |
| Camera and computer type | <a href="https://doi.org/10.3758/s13428-017-0904-8">10.3758/s13428-017-0904-8</a> ;<br><a href="https://doi.org/10.1038/s41386-020-0776-y">10.1038/s41386-020-0776-y</a><br><a href="https://doi.org/10.1016/j.jneumeth.2017.05.026">10.1016/j.jneumeth.2017.05.026</a> |
| Analysis Software        | <a href="https://doi.org/10.1089/zeb.2018.1662">https://doi.org/10.1089/zeb.2018.1662</a>                                                                                                                                                                               |
| Infrared fine tuning     | <a href="https://doi.org/10.1016/j.physbeh.2016.02.014">10.1016/j.physbeh.2016.02.014</a>                                                                                                                                                                               |

462

463

464 **Table S2: List of factors for the Western Blotting protocol**

| Category                         | Factor                                                                     |
|----------------------------------|----------------------------------------------------------------------------|
| <b>Generic - Design rigor</b>    | Establishing whether an experiment informs a formal knowledge claim or not |
|                                  | Blinding during experiment and during outcome assessment and analysis      |
|                                  | Randomization of allocation and documentation of method used               |
|                                  | Sample size and rationale behind sample size                               |
|                                  | Criteria for outliers                                                      |
|                                  | Inclusion and exclusion criteria or data censoring                         |
|                                  | Matching or balancing sex of animals/treatment of allocation               |
|                                  | Addressing confounds with treatment/setting/co-morbidities                 |
|                                  |                                                                            |
| <b>Tissue harvest - subjects</b> | Age                                                                        |
|                                  | Body Weight                                                                |
|                                  | Strain - incl. substrain                                                   |
|                                  | Breeder                                                                    |
|                                  | Transport from Breeder                                                     |
|                                  | Standardization of husbandry practice                                      |
|                                  | Acclimatization to holding facility prior to experimentation               |
|                                  | Sex                                                                        |
|                                  | Estrous cycle                                                              |
| Gonadal Hormones                 |                                                                            |

## PEERS - Platform for the Exchange of Experimental Research Standards

|                                  |                                                                    |
|----------------------------------|--------------------------------------------------------------------|
|                                  | Weaning age                                                        |
|                                  | Gut Microbiome                                                     |
|                                  | Specific Pathogen Free                                             |
|                                  | Suitability of controls for the experiment                         |
|                                  | Recording of physiological variables during experiment             |
| <b>Tissue housing conditions</b> | Home cage type (Size, Color, etc)                                  |
|                                  | Home cage bedding type                                             |
|                                  | Enrichment                                                         |
|                                  | Room Temperature                                                   |
|                                  | Room Humidity                                                      |
|                                  | Light intensity/type                                               |
|                                  | Circadian Rhythm/Light Cycle                                       |
|                                  | Acoustic noise (also radio)                                        |
|                                  | Ultrasound noise                                                   |
|                                  | Vibration noise                                                    |
|                                  | Group or isolated housing                                          |
|                                  | Food type and dispenser and if there were any restrictions on diet |
|                                  | Food type of dams before conception, during gestation or lactation |
|                                  | Cleaning frequency, bedding transfer                               |
|                                  | IVC/isolator or open cages                                         |
| <b>Tissue handling specifics</b> | Sex of Experimenter                                                |
|                                  | Lab policy on use of perfume, skin care                            |
|                                  | Researcher experienced/not                                         |
|                                  | Stress history of the animal (early life/chronic/acute etc.)       |
|                                  | Habituation to handling                                            |
|                                  | Handling method                                                    |
|                                  | Inter-operator variability                                         |

## PEERS - Platform for the Exchange of Experimental Research Standards

|                              |                                                                  |
|------------------------------|------------------------------------------------------------------|
| <b>Test conditions</b>       |                                                                  |
| <b>Sample preparation</b>    | Multiple freeze thaw cycles affecting degradation                |
|                              | Method of tissue homogenization                                  |
|                              | Buffer utilized for tissue homogenization and sample preparation |
|                              | Fractionation procedure                                          |
|                              | Protease inhibitors                                              |
|                              | Temperature of boiling sample                                    |
|                              | Storage                                                          |
| <b>Sample quantification</b> | Buffer compatibility                                             |
|                              | Protein quantification method                                    |
| <b>Polyacrylamide gel</b>    | Type of gel utilized                                             |
|                              | Manufacturer                                                     |
|                              | % gel                                                            |
|                              | Age/ lot                                                         |
| <b>Membrane</b>              | Membrane type                                                    |
|                              | Age/lot                                                          |
|                              | Manufacturer                                                     |
| <b>Sample loading</b>        | Amount of protein loaded onto gels                               |
| <b>Transfer conditions</b>   | Protein size                                                     |
|                              | Transfer buffer                                                  |
|                              | Transfer time                                                    |
|                              | Current/voltage                                                  |
| <b>Blocking solution</b>     | Type of blocking solution                                        |
|                              | Concentration                                                    |
|                              | Cross-reactivity                                                 |
| <b>Primary antibody</b>      | Specificity                                                      |
|                              | Titer                                                            |
|                              | Affinity                                                         |



## PEERS - Platform for the Exchange of Experimental Research Standards

|                           |                                                    |
|---------------------------|----------------------------------------------------|
|                           | Incubation time                                    |
|                           | Source animal                                      |
|                           | Concentration                                      |
|                           | Lot                                                |
|                           | Temperature                                        |
| <b>Secondary antibody</b> | HRP conjugate enzyme activation level and activity |
|                           | Source animal                                      |
|                           | Concentration                                      |
|                           | Temperature                                        |
|                           | Incubation time                                    |
| <b>Washing</b>            | Buffer                                             |
|                           | Frequency                                          |
|                           | Volume                                             |
|                           | Duration                                           |
| <b>Normalization</b>      | Loading control utilized                           |
|                           | Housekeeping proteins                              |
| <b>Detection</b>          | Detection method                                   |
|                           | Substrate type, lot, sensitivity                   |
|                           | Age of substrate                                   |
|                           | Film age                                           |
|                           | Type of imaging instrument                         |
|                           | Exposure time                                      |
| <b>Quantification</b>     | Quantification (densitometry)                      |
|                           | Software used                                      |
|                           | Background subtraction                             |
|                           | Signal saturation                                  |

465

466

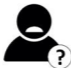

## Question

Is Factor X important for Protocol Y?

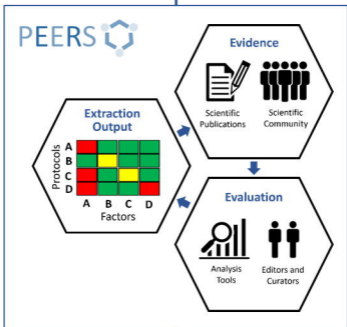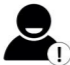

## Answer

The strength of evidence is high that Factor X is important for Protocol Y and should therefore be considered during the design of your experiment.

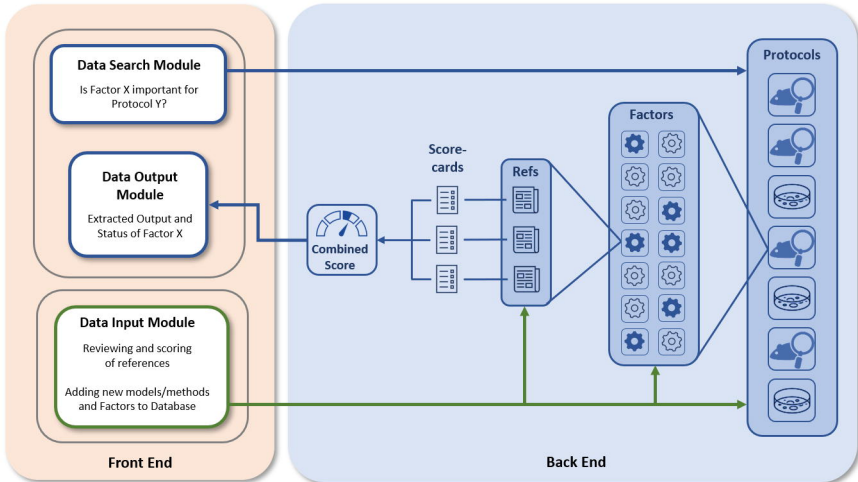

Search...

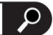

“Does the factor ‘Illumination level of Arena’ affect the outcome of the Open Field test?”

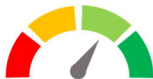

The *Extracted Output* of the factor ‘Illumination level of Arena’ is scored as ‘HIGH’: it is highly likely that this factor will affect the outcome of the Open Field paradigm.

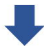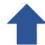

| Protocols  |
|------------|
| Water Maze |
| EEG        |
| CPP        |
| Open Field |
| PCR        |
| ELISA      |

| Factors            |
|--------------------|
| Temperature        |
| Illumination level |
| Humidity           |
| Background noise   |
| Weaning age        |
| Gut Microbiome     |

| References   |
|--------------|
| Kapogiannat. |
| Kršiak       |
| Bouwknrecht  |
| E.Igarashi   |
| Thomson      |

| Scorecards |      |      |
|------------|------|------|
| Rev1       | Rev2 | Rev3 |
|            |      |      |
|            |      |      |
|            |      |      |
|            |      |      |
|            |      |      |

Combined Score

14.5
